# Supplementary material for: Evaluation of Long-Term Outcomes of Direct Acting Antiviral Agents in Chronic Kidney Disease Subjects: A Single Center Cohort Study
Source: MDPI journal article supplement (doi:10.3390/jcm12103513), 2023-05-17
Supplement: s1 [file s1]

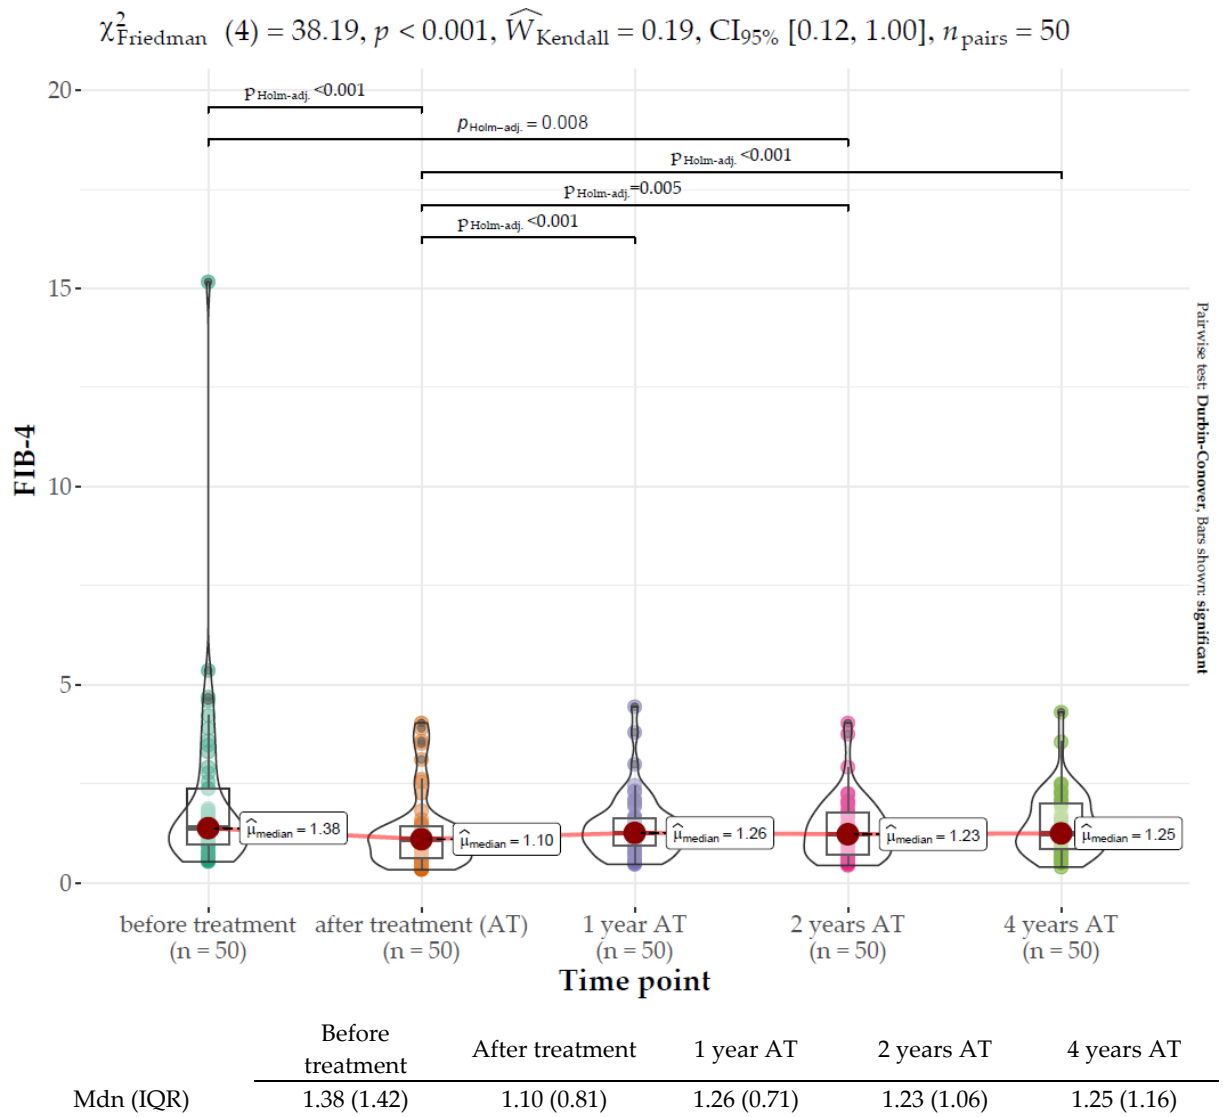

Figure S1. Distribution of the FIB-4 parameter at baseline, end of treatment (EOT), and 1, 2, and 4 years following sustained virologic response (SVR) in kidney transplant recipients.

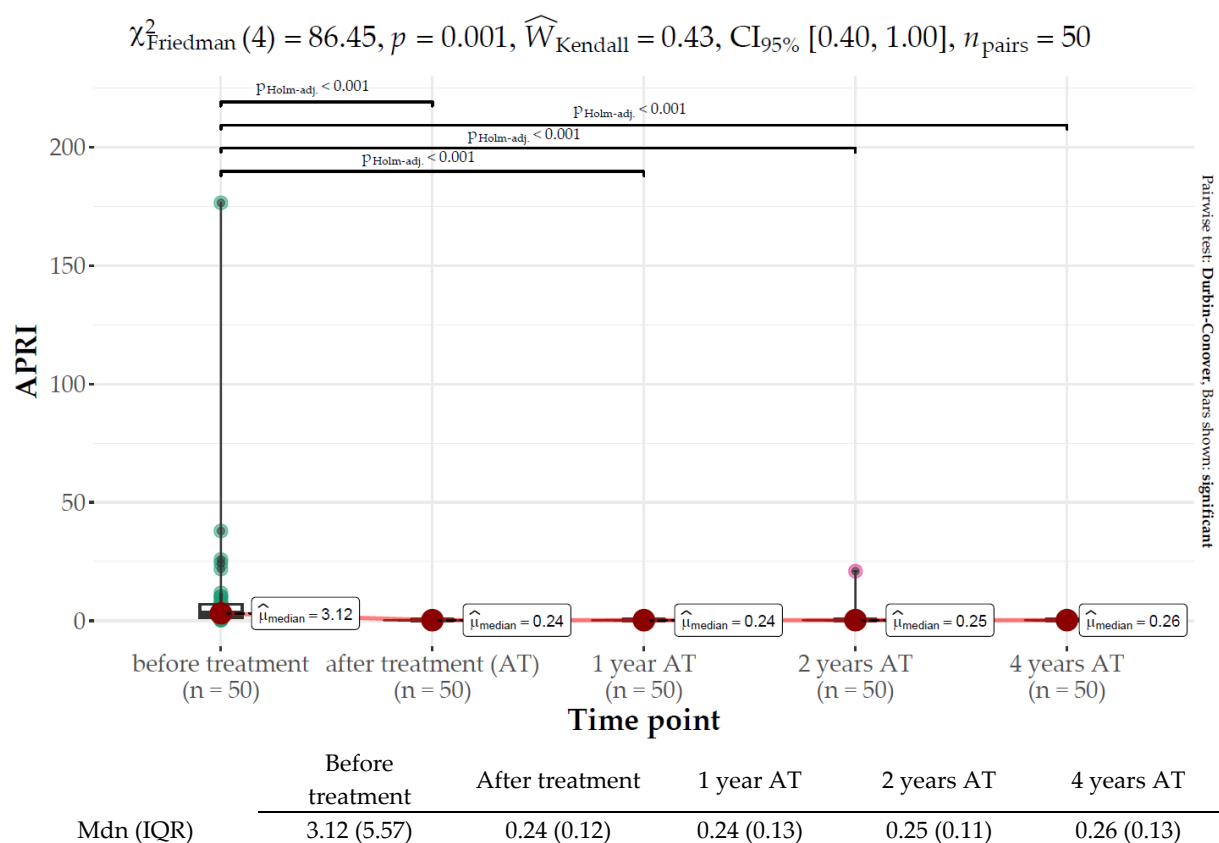

Figure S2. Distribution of APRI parameter at baseline, end of treatment (EOT), and 1, 2, and 4 years following sustained virologic response (SVR) in kidney transplant recipients.

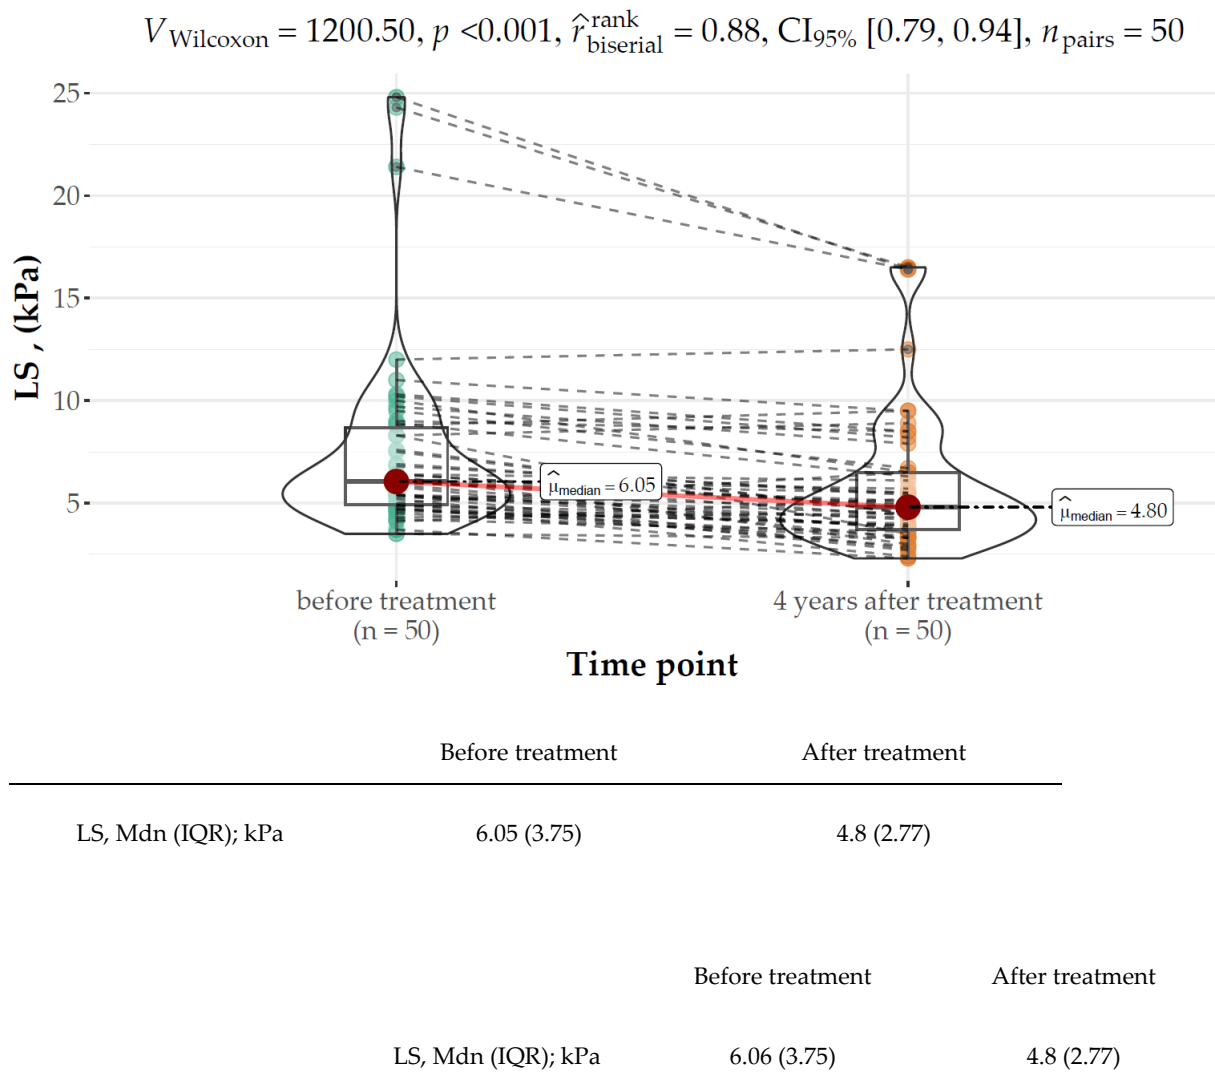

**Figure S3.** Distribution of LS (kPa) parameters at baseline and 4 years after the end of treatment (EOT) in kidney transplant recipients.

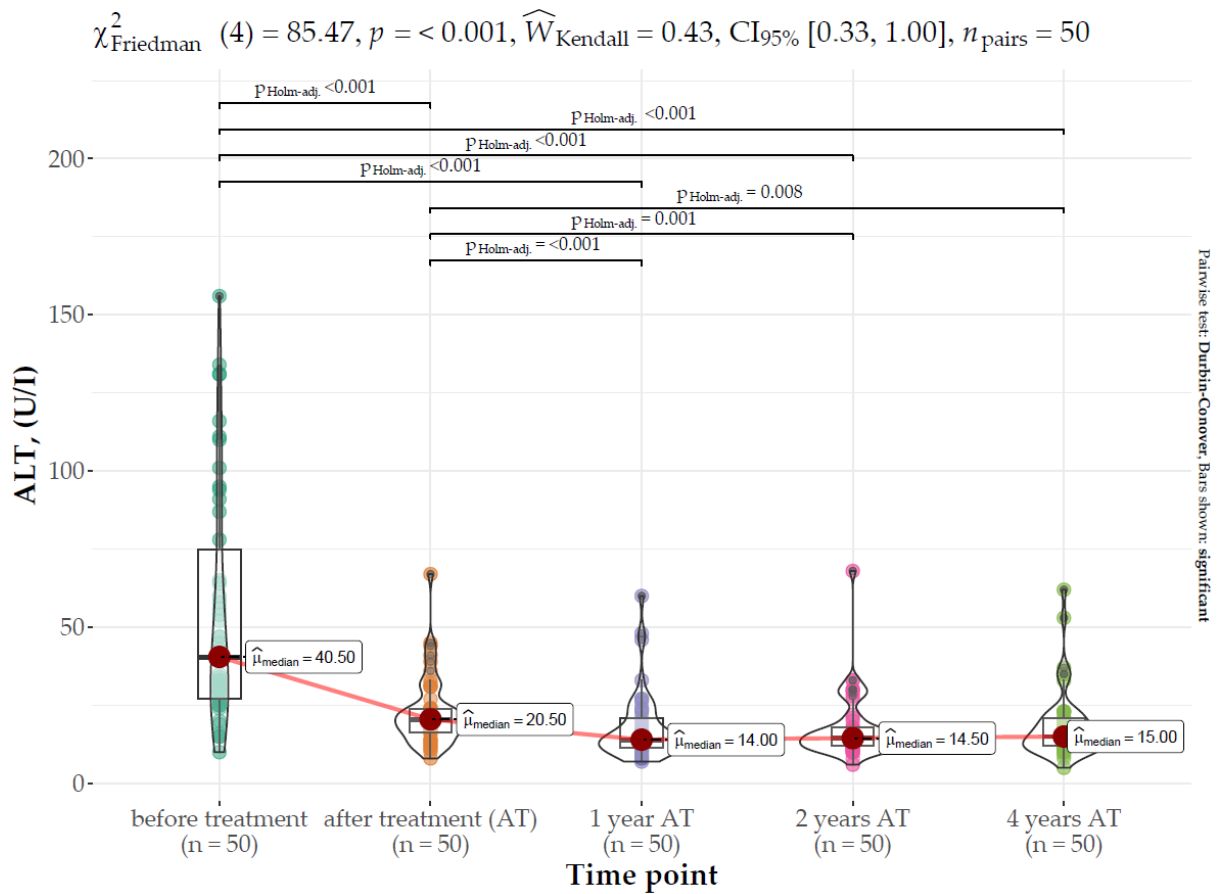

|           | Before treatment | After treatment | 1 year AT   | 2 years AT  | 4 years AT   |
|-----------|------------------|-----------------|-------------|-------------|--------------|
| Mdn (IQR) | 40.5 (47.75)     | 20.2 (0.12)     | 14.0 (9.50) | 14.5 (6.00) | 15.00 (8.75) |

Figure S4 Distribution of alanine aminotransferase (ALT, U/l) at baseline, end of treatment (EOT), and 1, 2, and 4 years following sustained virologic response (SVR) in kidney transplant recipients.

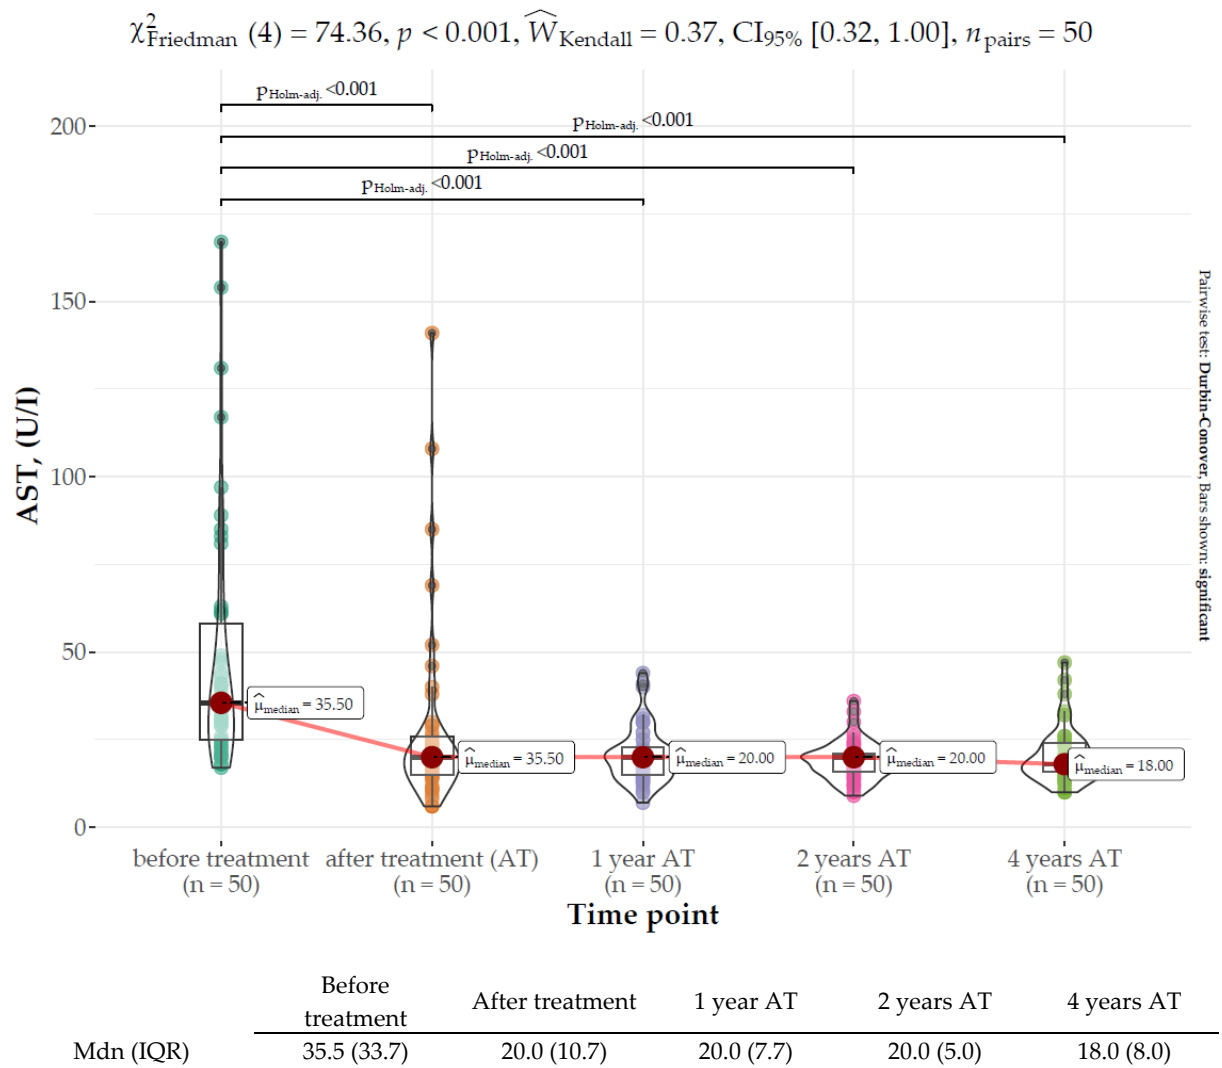

Figure S5 Distribution of aspartate aminotransferase (AST, U/l) at baseline, end of treatment (EOT), and 1, 2, and 4 years following sustained virologic response (SVR) in kidney transplant recipients.

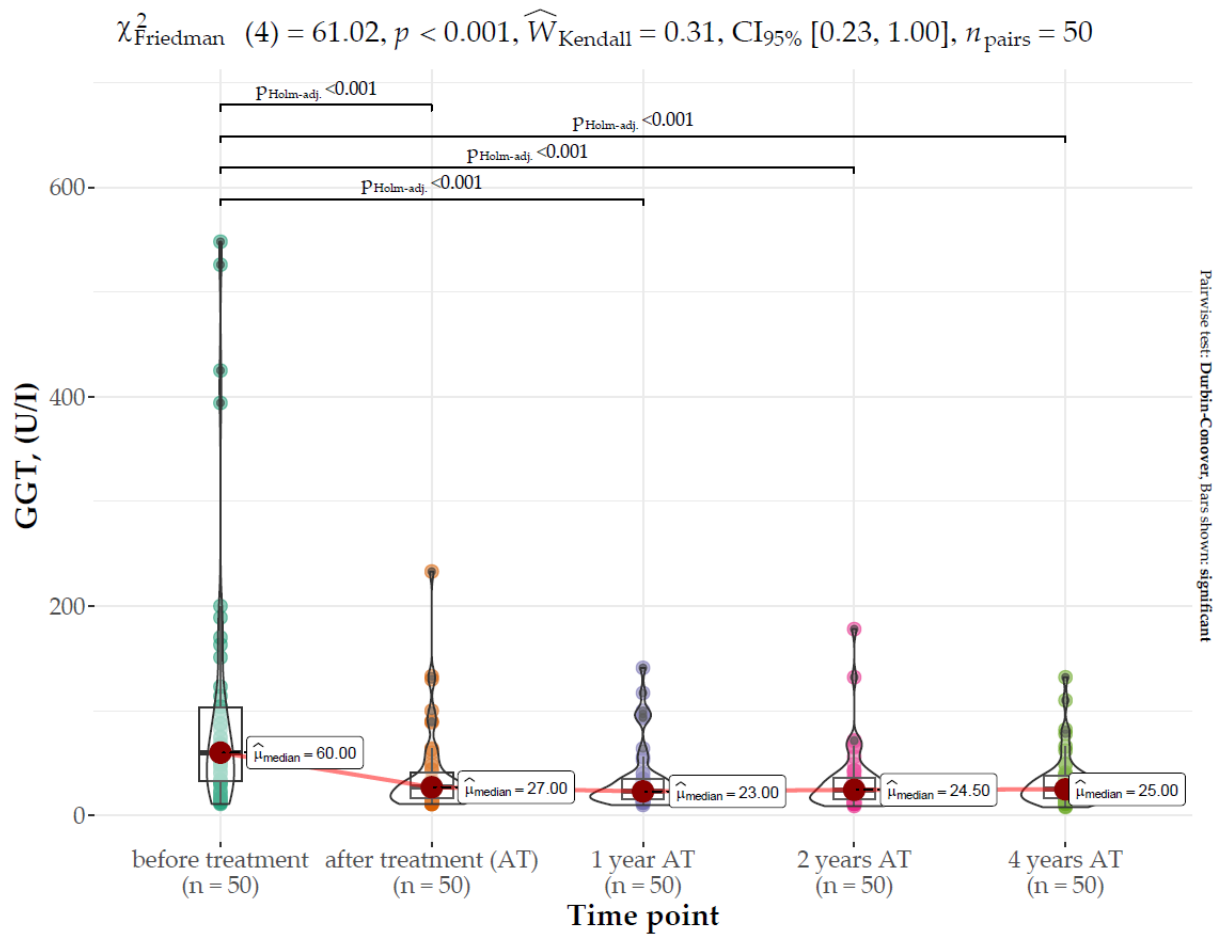

|           | Before treatment | After treatment | 1 year AT   | 2 years AT  | 4 years AT  |
|-----------|------------------|-----------------|-------------|-------------|-------------|
| Mdn (IQR) | 60.0 (70.5)      | 27.0 (24.5)     | 23.0 (18.7) | 24.5 (20.5) | 25.0 (20.5) |

Figure S6 Distribution of gamma glutamyl transferase (GGT, U/l) at baseline, end of treatment (EOT), and 1, 2, and 4 years following sustained virologic response (SVR) in kidney transplant recipients.
